# Supplementary material for: The Influence of Stress and Binge-Patterned Alcohol Drinking on Mouse Skeletal Muscle Protein Synthesis and Degradation Pathways
Source: MDPI journal article supplement (doi:10.3390/biom14050527), 2024-04-28
Supplement: s1 [file s1]

# Fig 2

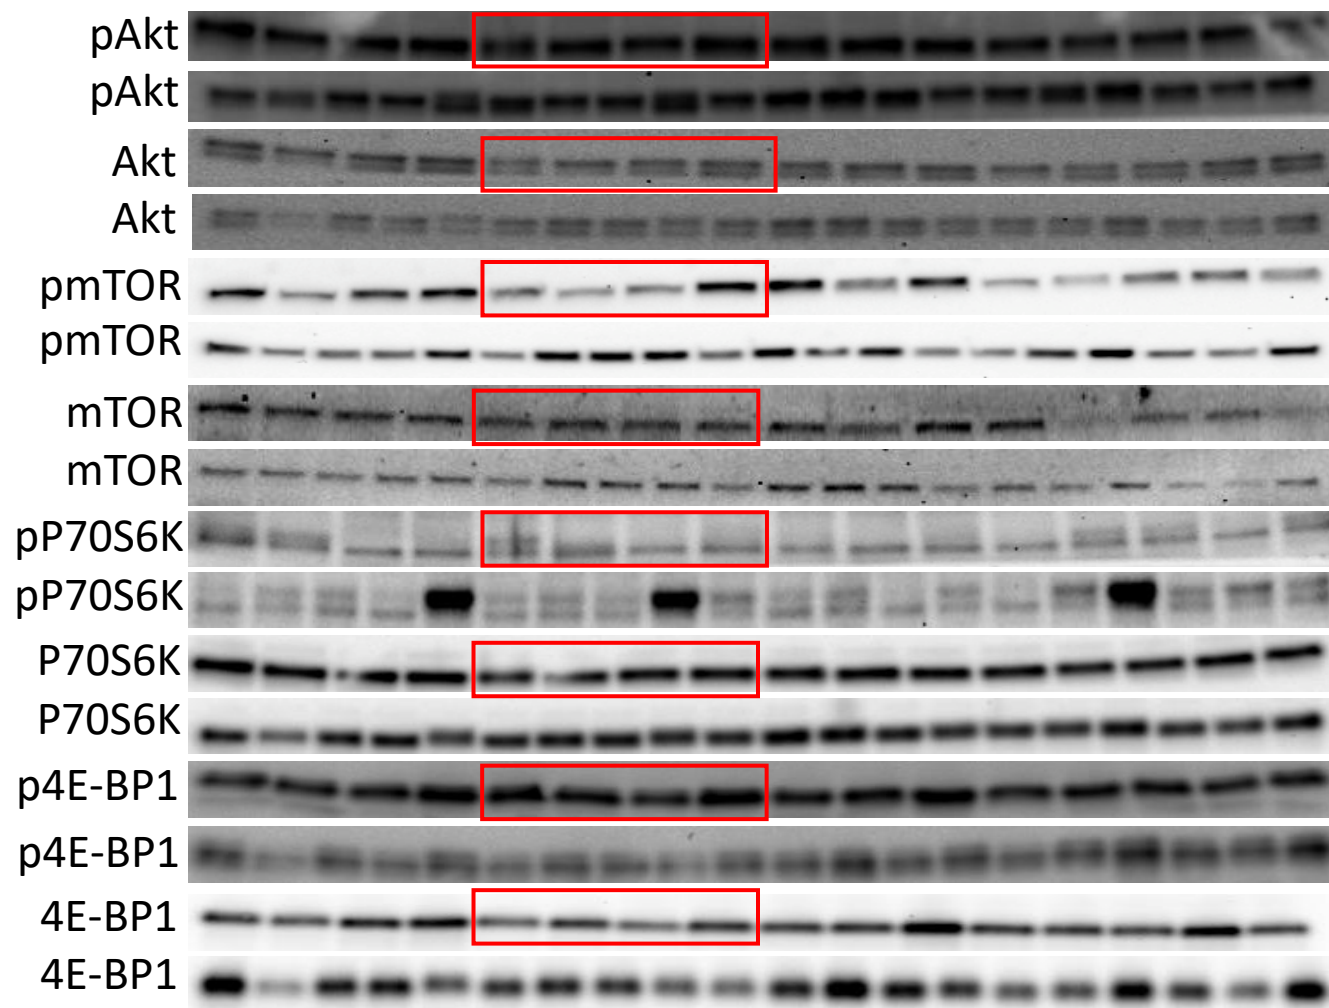

From left to right, blots are in repeats of No-stress water (control), no-stress alcohol, stress water, and stress alcohol.

# Fig 3

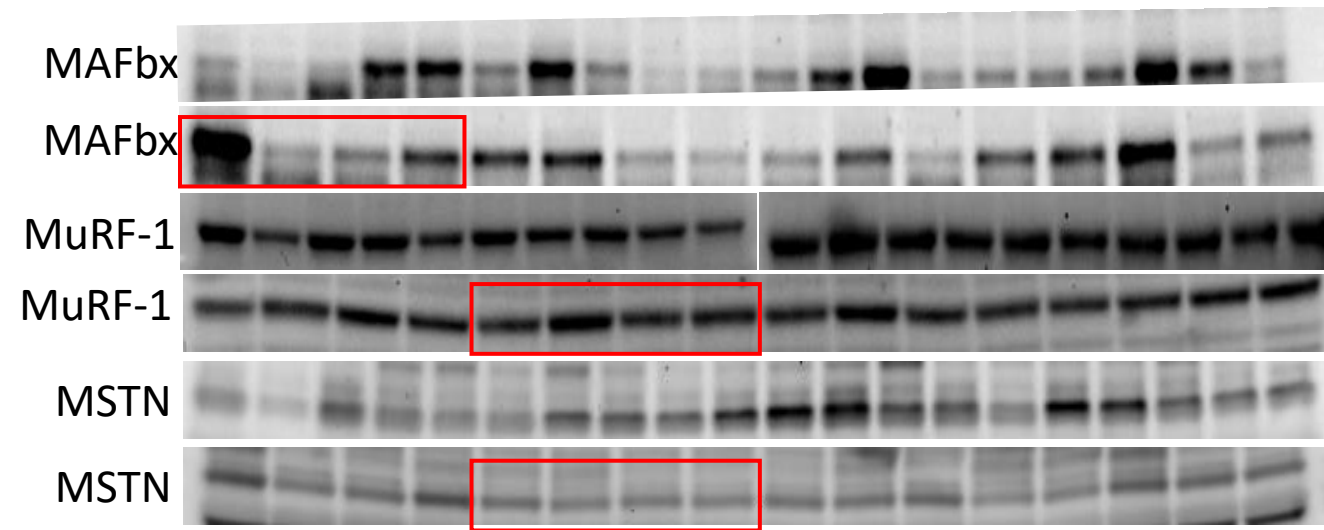

From left to right, blots are in repeats of No-stress water (control), no-stress alcohol, stress water, and stress alcohol.

## Poly-Ubiquitination

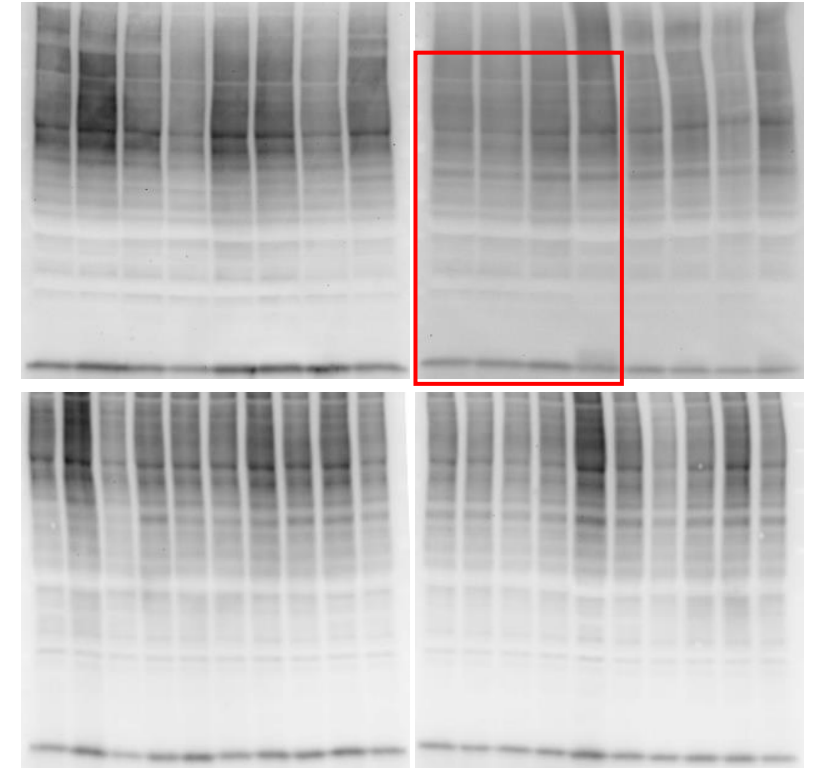

# Fig 4

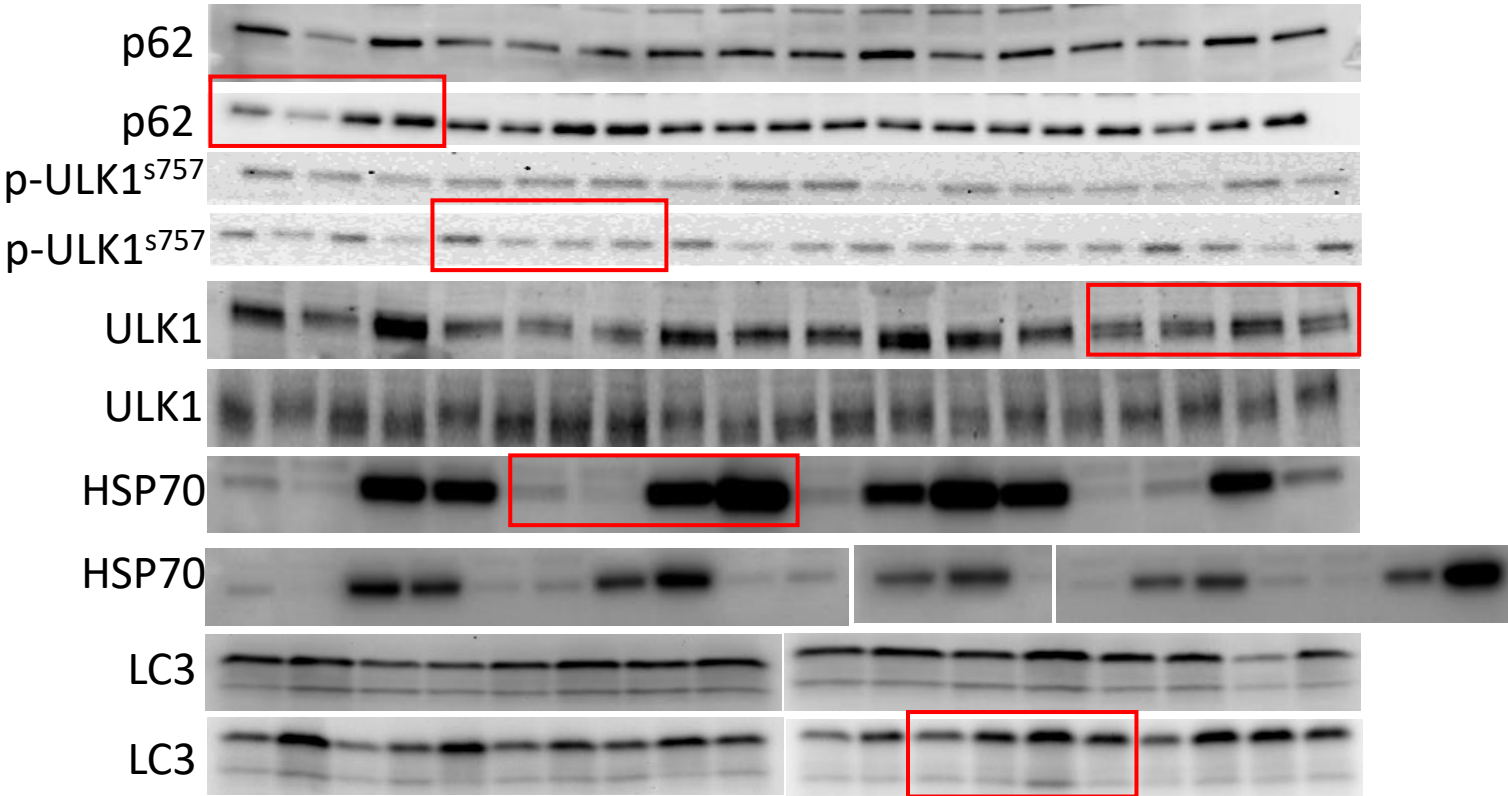

From left to right, blots are in repeats of No-stress water (control), no-stress alcohol, stress water, and stress alcohol.

Fig 5

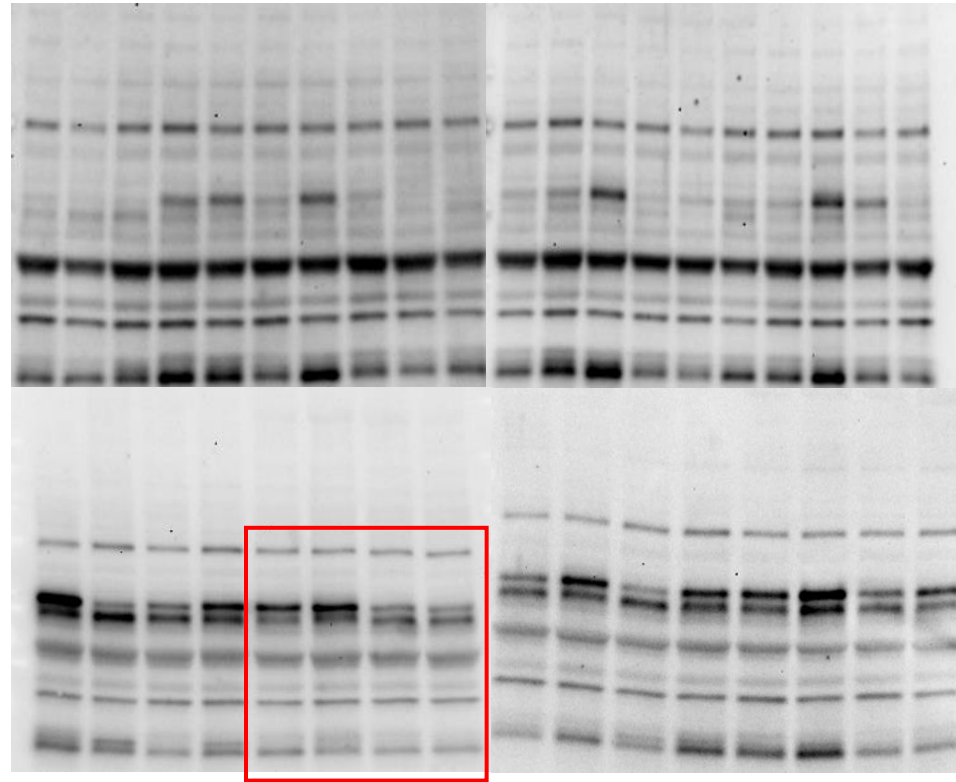

From left to right, blots are in repeats of No-stress water (control), no-stress alcohol, stress water, and stress alcohol.
